# Supplementary material for: Inhibition of lncRNA TMPO-AS1 suppresses proliferation, migration and invasion of colorectal cancer cells by targeting miR-143-3p
Source: PubMed Central journal article supplement — Mol Med Rep. 2020 Aug 11;22(4):3245–54. doi: 10.3892/mmr.2020.11427 (PMC7453500; doi:10.3892/mmr.2020.11427), 2020-08-11

Figure S1. Transfection efficiency of pcDNA-TMPO-AS1 and anti-miR-143-3p in SW480 and HCT15 cells. (A) Expression of TMPO-AS1 was detected using RT-qPCR in SW480 and HCT15 cells. (B) Expression of miR-143-3p was measured via RT-qPCR in SW480 and HCT15 cells. \*P<0.05 vs. corresponding control group. miR, microRNA; RT-qPCR, reverse transcription-quantitative PCR; AS, antisense.

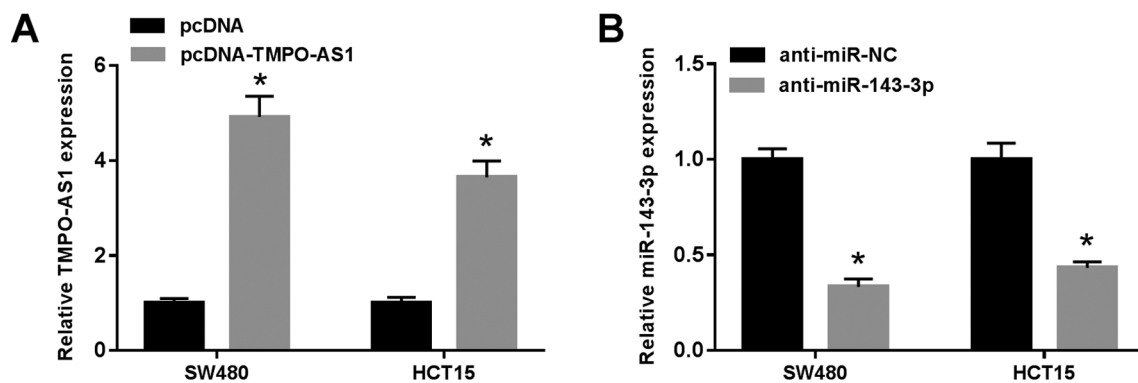

Supplement: Supplementary_Data.pdf [file Supplementary_Data.pdf]
